# Supplementary material for: Whole-Genome Deep Sequencing Reveals Host-Driven in-planta Evolution of Columnea Latent Viroid (CLVd) Quasi-Species Populations
Source: MDPI journal article supplement (doi:10.3390/ijms21093262), 2020-05-05
Supplement: s1 [file s1]

| Experiments                           | CLVd isolates | AC numbers | Host plants (3-10 plants/experiment) |                    |                     |                   |           |            |                     |             |
|---------------------------------------|---------------|------------|--------------------------------------|--------------------|---------------------|-------------------|-----------|------------|---------------------|-------------|
|                                       |               |            | tomato cv. Insaf F1                  | tomato cv. Rutgers | tomato cv. Seeda 50 | tomato cv. Cherry | bolo maka | hot pepper | Thai round eggplant | bell pepper |
| <b>1 (20-Sep-2017)</b><br>(injection) | PC-2-Pa29     | DQ061193   | 0/6                                  | na.                | na.                 | na.               | 0/5       | 0/6        | 0/5                 | 0/3         |
|                                       | PC-2-Pa54     | DQ061192   | 0/6                                  | na.                | na.                 | na.               | 0/5       | 0/6        | 0/5                 | 0/3         |
|                                       | Solanum 1     | JF742632   | 0/6                                  | na.                | na.                 | na.               | 0/5       | 0/6        | 0/5                 | 0/3         |
|                                       | Solanum 4     | JF742633   | 0/6                                  | na.                | na.                 | na.               | 0/5       | 0/6        | 0/5                 | 0/3         |
|                                       | Chaipayon-1   | KM214216   | 1/6                                  | na.                | na.                 | na.               | 0/5       | 0/6        | 0/5                 | 0/3         |
|                                       | Niruj-18      | KM214222   | 1/6                                  | na.                | na.                 | na.               | 0/5       | 0/6        | 0/5                 | 0/3         |
|                                       | LPng19-4c1    | JF446934   | 0/6                                  | na.                | na.                 | na.               | 0/5       | 0/6        | 0/5                 | 0/3         |
|                                       | LP1-6c5       | JF446916   | 0/6                                  | na.                | na.                 | na.               | 0/5       | 0/6        | 0/5                 | 0/3         |
|                                       |               |            |                                      |                    |                     |                   |           |            |                     |             |
| <b>2 (4-Feb-2019)</b><br>(injection)  | PC-2-Pa29     | DQ061193   | na.                                  | 0/5                | 0/5                 | 0/3               | 0/5       | 0/3        | 0/3                 | na.         |
|                                       | Solanum 1     | JF742632   | na.                                  | 0/5                | 0/5                 | 0/3               | 0/5       | 0/3        | 0/3                 | na.         |
|                                       | Chaipayon-1   | KM214216   | na.                                  | 0/5                | 0/5                 | 0/3               | 0/5       | 0/3        | 0/3                 | na.         |
|                                       | LPng19-4c1    | JF446934   | na.                                  | 0/5                | 0/5                 | 0/3               | 0/5       | 0/3        | 0/3                 | na.         |
|                                       |               |            |                                      |                    |                     |                   |           |            |                     |             |
| <b>3 (16-Apr-2019)</b><br>(injection) | PC-2-Pa29     | DQ061193   | na.                                  | 0/10               | 0/5                 | na.               | 0/5       | na.        | na.                 | na.         |
|                                       | Solanum 1     | JF742632   | na.                                  | 1/10               | 0/5                 | na.               | 0/5       | na.        | na.                 | na.         |
|                                       | Chaipayon-1   | KM214216   | na.                                  | 0/10               | 0/5                 | na.               | 0/5       | na.        | na.                 | na.         |
|                                       |               |            |                                      |                    |                     |                   |           |            |                     |             |
|                                       |               |            |                                      |                    |                     |                   |           |            |                     |             |
| (grafting)                            | PC-2-Pa29     | DQ061193   | na.                                  | na.                | na.                 | na.               | 0/5       | na.        | na.                 | na.         |
|                                       | Solanum 1     | JF742632   | na.                                  | na.                | na.                 | na.               | 0/5       | na.        | na.                 | na.         |
|                                       | Chaipayon-1   | KM214216   | na.                                  | na.                | na.                 | na.               | 0/5       | na.        | na.                 | na.         |

All the plants were inoculated directly by dsDNA CLVds

All the infection results were tested by RT-PCR
