# Supplementary material for: Whole-Genome Deep Sequencing Reveals Host-Driven in-planta Evolution of Columnea Latent Viroid (CLVd) Quasi-Species Populations
Source: MDPI journal article supplement (doi:10.3390/ijms21093262), 2020-05-05
Supplement: s1 [file s1]

**multimeric sized** ➡  
**dimeric sized** ➡  
**monomeric sized** ➡

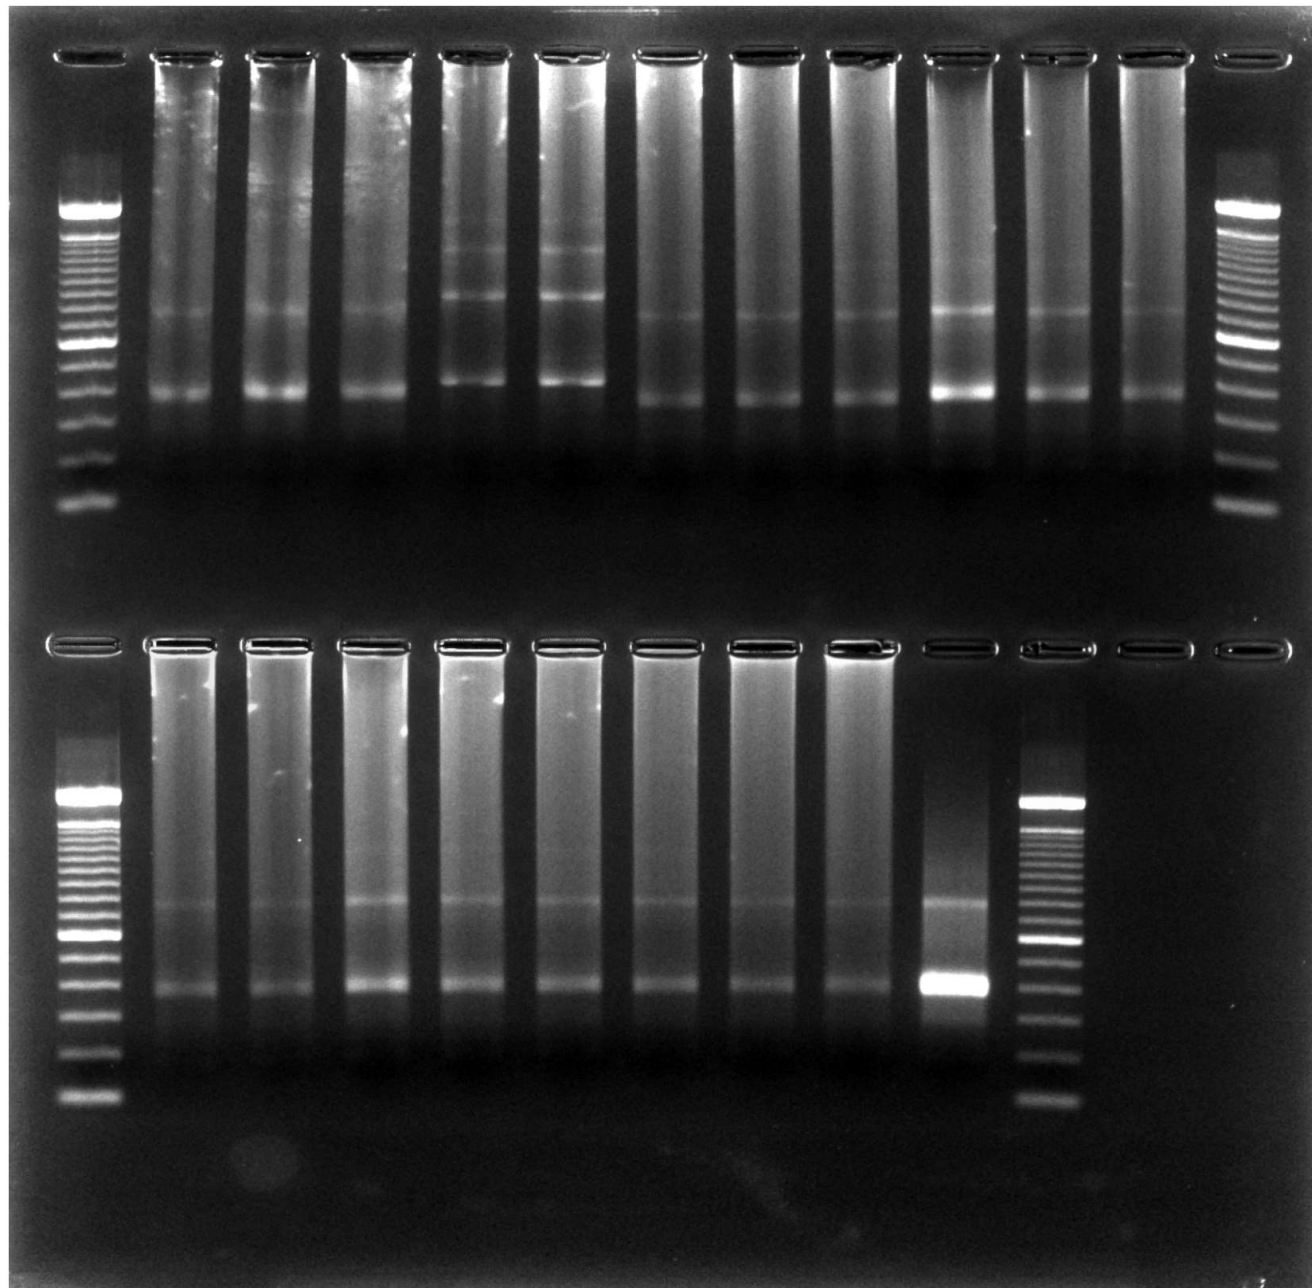

**multimeric sized** ➡  
**dimeric sized** ➡  
**monomeric sized** ➡
